# Supplementary material for: A banana peel/silicon glue coated stir bar for extraction of aspirin, diclofenac, ibuprofen and mefenamic acid followed by high performance liquid chromatography-UV detection
Source: Royal Society of Chemistry journal article supplement (doi:10.1039/d0ay01332c), 2020-01-01
Supplement: d0ay01332c1.pdf [file d0ay01332c1.pdf]

**Banana peel/silicon glue coated stir bar for extraction of aspirin, diclofenac, ibuprofen and mefenamic acid followed by high performance liquid chromatography –UV detection**

Zahra Jafari, Mohammad Reza Hadjmohammadi\*

Department of Analytical Chemistry, Faculty of Chemistry, University of Mazandaran,

NirooHavayii boulevard, 47416-95447 Babolsar, Iran

\*Corresponding author: Prof. M.R. Hadjmohammadi, Department of Analytical Chemistry,  
Faculty of Chemistry, University of Mazandaran, NirooHavayii boulevard, 47416-95447  
Babolsar, Iran

Tel.: +98 113532350; fax: +98 1135302350.

E-mail address: hadjmr@umz.ac.ir (M.R. Hadjmohammadi)

To optimize the level of these two significant parameters and to estimate their interaction, response surface methodology based on CCD, as a multivariate statistic technique, was applied. CCD is composed of a factorial design (2<sup>f</sup>) augmented with (2<sup>f</sup>) star points, where f is the number of factors to be optimized, and with a central point, which can be run n times.

A total of 13 experimental runs are needed, which were carried out randomly. The matrix of CCD experiments obtained from MINITAB and the response (sum of the peak area of the analytes) is indicated in Table S4. The established polynomial model to predict the extraction performance in terms of original factors and interaction of the variable is in accordance with equation 2). The model analysis was carried out by ANOVA (TableS5). The significance of each coefficient was investigated by F-test and P-value(probability). The p-values higher than 5% indicated that the variable has no significant effect on the model and can be removed. Based on ANOVA, lack of fit (LOF) was measured 0.476. High R<sup>2</sup> demonstrated that the prognosticated answer is completely correct. The high value of adjusted R<sup>2</sup> illustrated the correlation between the experimental response and the fitted model (TableS6). It can be derived from the data that the response equation created a suitable and sensible model for CCD. Eventually, the elution solvent volume of 137 μL and desorption time of 7.3 min were chosen as the optimum condition of the method (TableS7).

To examine the capability of the RSM model validation was studied. The predicted peak area taken from the MINITAB software was 245.25 while the mean factual peak area for extraction of analytes under the optimum condition was 251.3. Based on the following equation, the percentage error was calculated to be 2.46%:

$$\% \text{ Error} = \frac{A - B}{B} \times 100$$

In the equation, A and B are the experimental and the predicted peak area, respectively. The obtained small error (%), approved the RSM ability for optimization.

## **Figure caption**

**Figure S1.** Effect of desorption solvent type on the extraction efficiency.

**Figure S2.** Pareto chart of the standardized effects obtained from a Plackett-Burman design.

**Figure S3.** Response surface plots of each pair of the independent factors: desorption time vs. desorption solvent volume.

**Figure S4.** Profiles for predicted values and desirability function for the extraction target analytes.

**Figure S5.** Reproducibility and reusability of banana peel-silicon glue bar.

**Figure S6.** Effect of plasma matrix on determination of analytes.

**Table 1**

Experimental variables and levels of the Plackett–Burman design

| Factor | Name                      | Level       |             |
|--------|---------------------------|-------------|-------------|
|        |                           | Min<br>(-1) | Max<br>(+1) |
| A      | Extraction time (min)     | 5           | 30          |
| B      | pH                        | 3           | 11          |
| C      | Desorption Time (min)     | 2           | 10          |
| D      | Stirring rate (rpm)       | 100         | 1500        |
| E      | Solvent volume ( $\mu$ L) | 100         | 500         |

**Table 2**

The matrix of the Plackett–Burman design experiments obtained from MINITAB and the response (sum of peak area).

| Experimen<br>tal number | Factors |    |    |    |    | Response<br>( NSAIDs) |
|-------------------------|---------|----|----|----|----|-----------------------|
|                         | A       | B  | C  | D  | E  |                       |
| 1                       | 1       | -1 | -1 | -1 | 1  | 27157                 |
| 2                       | -1      | -1 | 1  | 1  | 1  | 57589                 |
| 3                       | 1       | -1 | 1  | -1 | -1 | 141689                |
| 4                       | -1      | -1 | -1 | -1 | -1 | 98914                 |
| 5                       | -1      | 1  | 1  | -1 | 1  | 22292                 |
| 6                       | 1       | 1  | -1 | 1  | -1 | 78486                 |
| 7                       | -1      | 1  | 1  | 1  | -1 | 138757                |
| 8                       | -1      | -1 | -1 | 1  | 1  | 9889                  |
| 9                       | 1       | 1  | 1  | -1 | 1  | 33440                 |
| 10                      | -1      | 1  | -1 | -1 | -1 | 115454                |
| 11                      | 1       | 1  | 1  | 1  | -1 | 185189                |
| 12                      | 1       | 1  | -1 | 1  | 1  | 24775                 |

**Table 3**

Analysis of the variance for the fit of the experimental data to Plackett–Burman design (for NSAIDs)

| Source          | Degree of freedom (D.F) | Adjusted sum of squares (adj. SS) | Adjusted mean squares (adj. MS) | <i>F</i> -value | <i>p</i> -Value |
|-----------------|-------------------------|-----------------------------------|---------------------------------|-----------------|-----------------|
| Model           | 5                       | 33957338208                       | 6791467642                      | 15.19           | 0.002           |
| Linear          | 5                       | 33957338208                       | 6791467642                      | 15.19           | 0.002           |
| extraction time | 1                       | 190730107                         | 190730107                       | 0.43            | 0.538           |
| pH              | 1                       | 958064311                         | 958064311                       | 2.14            | 0.194           |
| desorption time | 1                       | 4191830580                        | 4191830580                      | 9.38            | 0.022           |
| stirring rate   | 1                       | 258903010                         | 258903010                       | 0.58            | 0.475           |
| solvent volume  | 1                       | 28357810201                       | 28357810201                     | 63.43           | 0.000           |
| Error           | 6                       | 2682414691                        | 447069115                       |                 |                 |
| Total           | 11                      | 36639752899                       |                                 |                 |                 |

**Table 4**

The matrix of the Central-Composite design experiments obtained from MINITAB and the responses.

| Experimental number | Factors         |                | Response |
|---------------------|-----------------|----------------|----------|
|                     | Desorption time | Solvent volume |          |
| 1                   | 0               | 1.4            | 591657   |
| 2                   | 0               | 0              | 777817   |
| 3                   | 1.4             | 0              | 790729   |
| 4                   | 0               | 0              | 775150   |
| 5                   | -1              | 1              | 1302859  |
| 6                   | -1.4            | 0              | 587325   |
| 7                   | 1               | -1             | 1263245  |
| 8                   | 0               | 0              | 777075   |
| 9                   | 0               | 0              | 773783   |
| 10                  | 0               | 0              | 772615   |
| 11                  | -1              | 1              | 491665   |
| 12                  | 0               | -1.4           | 1785983  |
| 13                  | 1               | 1              | 560264   |



**Table 5**

Analysis of the variance for the fit of the experimental data to response surface model

| Source      | Degree of freedom (D.F) | Adjusted sum of squares (adj. SS) | Adjusted mean squares (adj. MS) | F-value | p-Value |
|-------------|-------------------------|-----------------------------------|---------------------------------|---------|---------|
| Model       | 5                       | 1.61488E+12                       | 3.22976E+11                     | 155.05  | 0.000   |
| Linear      | 2                       | 1.29510E+12                       | 6.47550E+11                     | 310.87  | 0.000   |
| A           | 1                       | 12532745411                       | 12532745411                     | 6.02    | 0.044   |
| B           | 1                       | 1.28257E+12                       | 1.28257E+12                     | 615.73  | 0.000   |
| Square      | 2                       | 3.16851E+11                       | 1.58426E+11                     | 76.06   | 0.000   |
| AA          | 1                       | 18189342016                       | 18189342016                     | 8.73    | 0.021   |
| BB          | 1                       | 2.74827E+11                       | 2.74827E+11                     | 131.94  | 0.000   |
| Interaction | 1                       | 2927513342                        | 2927513342                      | 1.41    | 0.274   |
| AB          | 1                       | 2927513342                        | 2927513342                      | 1.41    | 0.274   |
| Error       | 7                       | 14580946316                       | 2082992331                      |         |         |
| Lack-of-Fit | 3                       | 14554572108                       | 4851524036                      | 735.80  | 0.000   |
| Pure Error  | 4                       | 26374208                          | 6593552                         |         |         |
| Total       | 12                      | 1.62946E+12                       |                                 |         |         |

**Table 6**

Estimated determination coefficient of the CCD design

| $R^2$ | $R^2$ (pred) | $R^2$ (adj) |
|-------|--------------|-------------|
| 99.11 | 93.65        | 98.47       |

**Table 7**

Optimized value of the factors obtained from CCD design (coded and un-coded values).

| Factor          | Desorption time | Solvent volume ( $\mu\text{L}$ ) |
|-----------------|-----------------|----------------------------------|
| Coded value     | + 0.0143        | -1.4                             |
| un-coded values | 7.3             | 137                              |

**Table 8.** The pka of the analytes.

| <i>Analyte</i>       | <i>pka</i> |
|----------------------|------------|
| <i>Aspirin</i>       | 3.5        |
| <i>Diclofenac</i>    | 4.1        |
| <i>Ibuprofen</i>     | 4.8        |
| <i>Mefnamic acid</i> | 4.5        |

**Table 9**

Summary of results for analysis of target analytes in plasma sample together with relative recovery after and before PP.

| Sample                       |                                   | Aspirin              | diclofenac | Ibuprofen | Mefenamic acid |
|------------------------------|-----------------------------------|----------------------|------------|-----------|----------------|
| <b>Plasma</b><br>(before pp) | Found ( $\mu\text{g L}^{-1}$ )    | 11                   | 13.6       | 11.4      | 12.2           |
|                              | Added ( $\mu\text{g L}^{-1}$ )    | 20                   | 20         | 20        | 20             |
|                              | Relative recovery                 | 55(3.8) <sup>a</sup> | 68(4.2)    | 57(4.5)   | 61(5.3)        |
| <b>Plasma</b><br>(after PP)  | Measured ( $\mu\text{g L}^{-1}$ ) | 16.6                 | 17.2       | 17.6      | 16.8           |
|                              | Added ( $\mu\text{g L}^{-1}$ )    | 20                   | 20         | 20        | 20             |
|                              | Relative recovery                 | 83(1.8)              | 86(2.1)    | 88(3.1)   | 84(3.8)        |

<sup>a</sup> RSD% value (n=3).

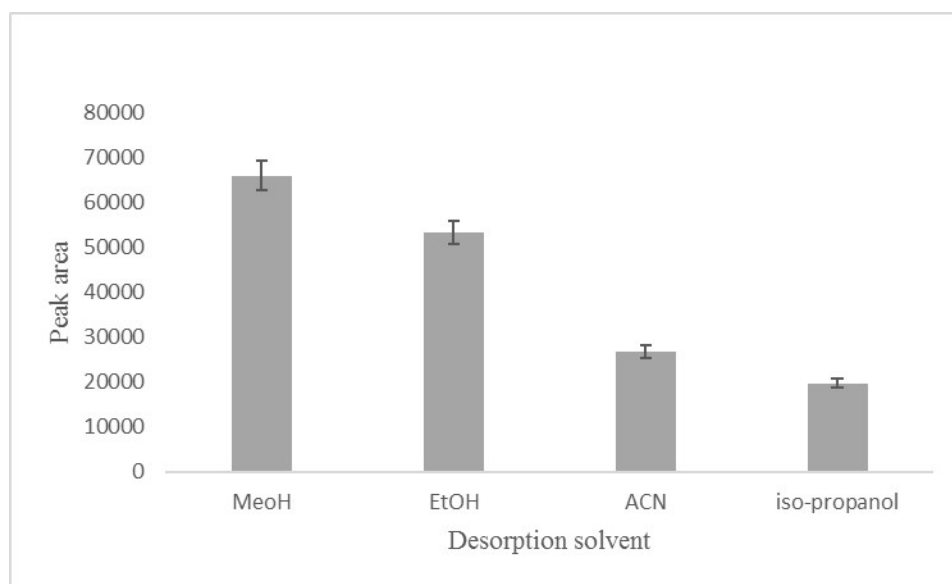

Figure S1

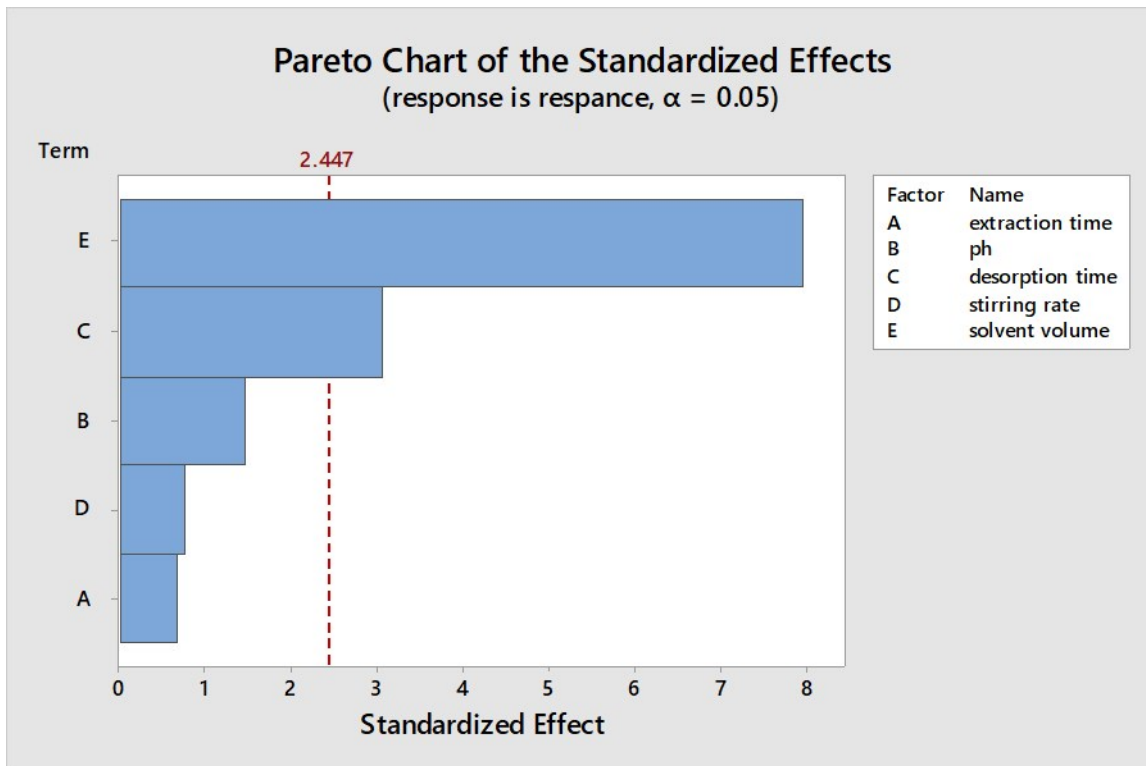

Figure S2

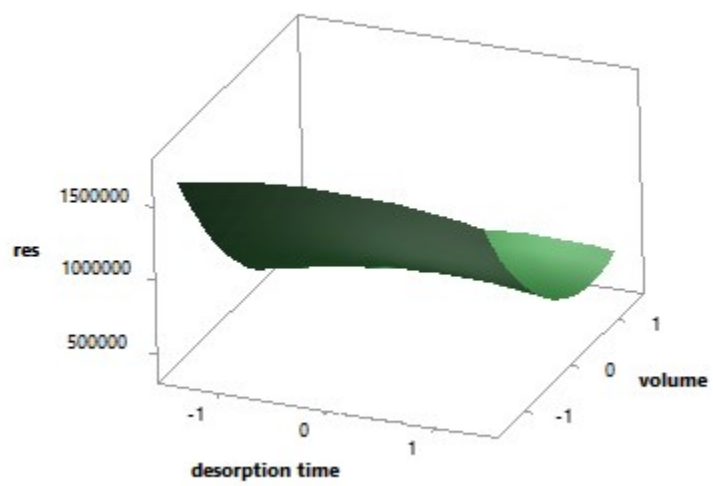

Figure S3



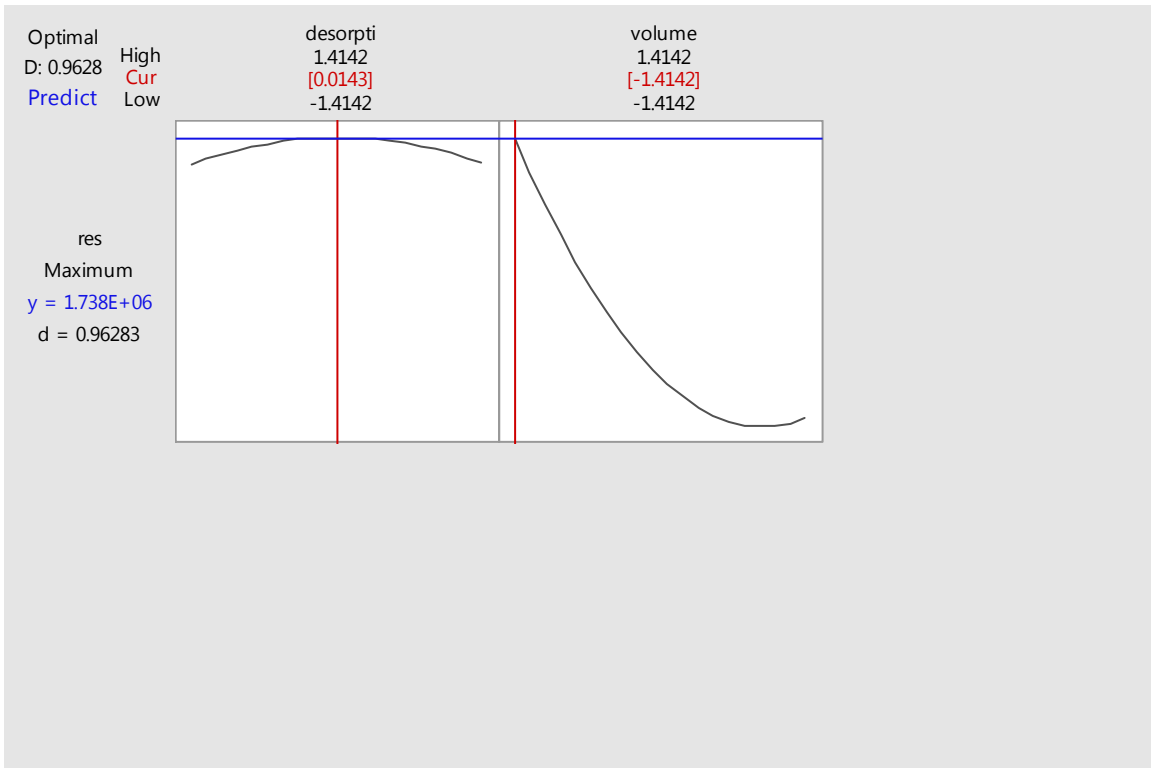

Figure S4

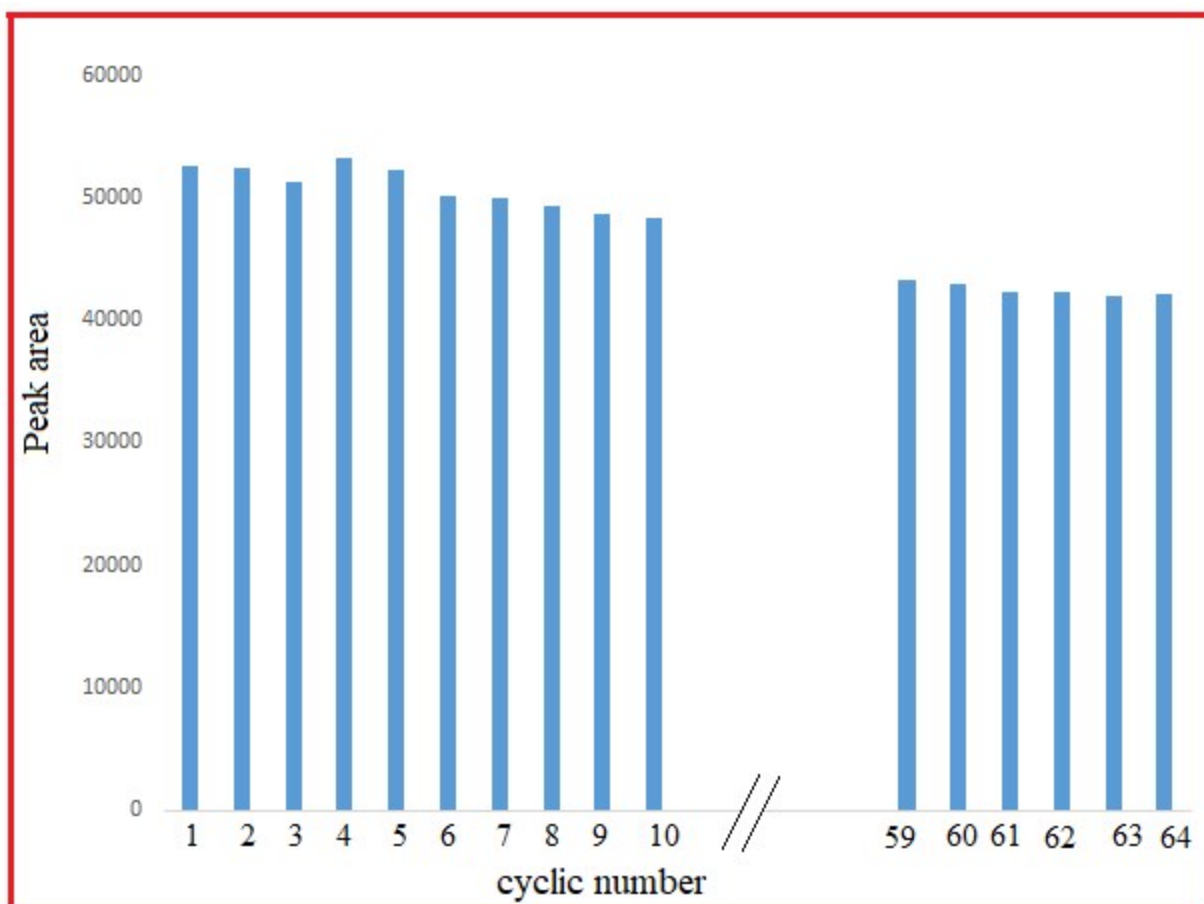

Figure S5

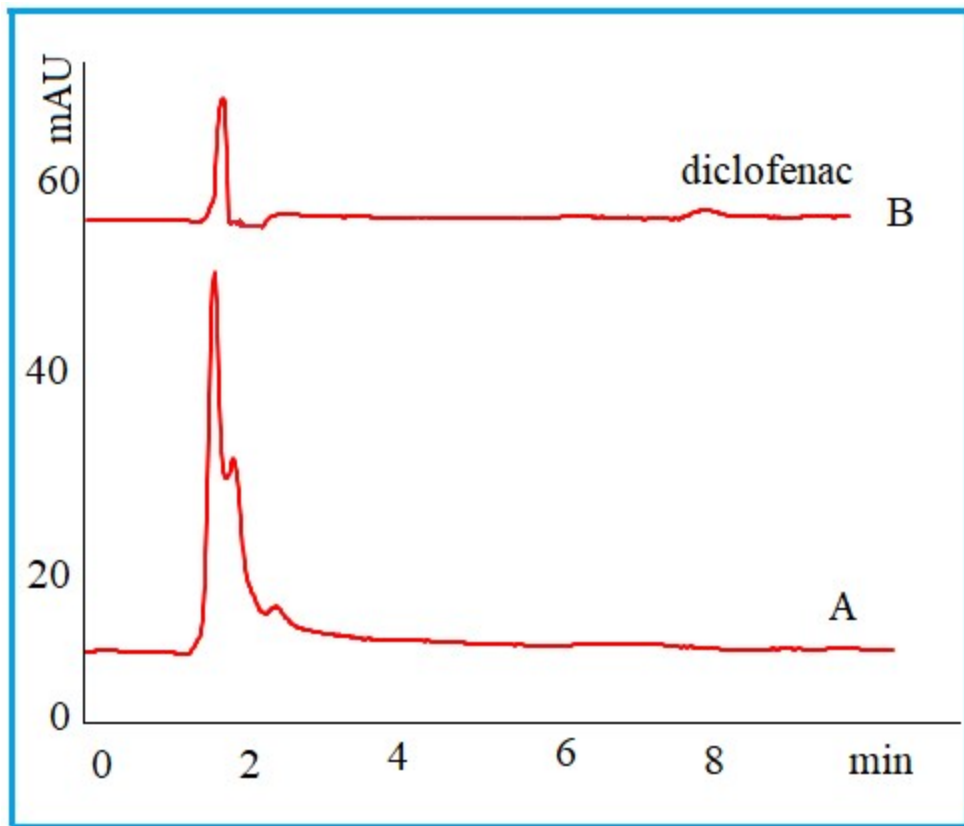

Figure S6
